# Supplementary material
Source: PubMed Central journal article supplement (PMC5954196)
Supplement: MCB.00038-18_zmb999101755s1.pdf [file MCB.00038-18_zmb999101755s1.pdf]

- 1 **Supplementary Tables, Pacheco et al 2018**
- 2
- 3 **Table S1.** Strains and Plasmids used in this work.
- 4 **Table S2.** RT qPCR data.
- 5 **Table S3.** Summary of EDC crosslinks within the Met4 72-160 - Med15 KIX123 complex

**Table S1. Strains and Plasmids****A. Yeast Strains**

| <b>Strain</b> | <b>Description</b>                                                                                                                                                                                                                              | <b>Reference</b> |
|---------------|-------------------------------------------------------------------------------------------------------------------------------------------------------------------------------------------------------------------------------------------------|------------------|
| SHY823        | <i>mata</i> $\Delta$ <i>ade2::hisG his3</i> $\Delta$ 200 <i>leu2</i> $\Delta$ 0 <i>lys2</i> $\Delta$ 0 <i>met15</i> $\Delta$ 0 <i>trp1</i> $\Delta$ 63 <i>ura3</i> $\Delta$ 0 <i>gcn4</i> $\Delta$ :: <i>KanMx</i>                              | (27)             |
| SHY822        | <i>mata</i> $\Delta$ <i>ade2::hisG his3</i> $\Delta$ 200 <i>leu2</i> $\Delta$ 0 <i>lys2</i> $\Delta$ 0 <i>met15</i> $\Delta$ 0 <i>trp1</i> $\Delta$ 63 <i>ura3</i> $\Delta$ 0 <i>gcn4</i> $\Delta$ :: <i>KanMx med15</i> $\Delta$ :: <i>HPH</i> | (27)             |

**B. Plasmids**

| <b>Name</b> | <b>Insert</b>                                                                            | <b>Vector</b> | <b>Marker</b> | <b>Reference</b> |
|-------------|------------------------------------------------------------------------------------------|---------------|---------------|------------------|
| pRS315      | none                                                                                     | --            | <i>LEU2</i>   | (59)             |
| pSH940      | Gcn4-Flag3 with 1 kb upstream DNA                                                        | pRS315        | <i>LEU2</i>   | (27)             |
| pSH942      | Gcn4 $\Delta$ 2-100 (Gcn4 cAD)                                                           | pSH940        | <i>LEU2</i>   | (27)             |
| pSH943      | Gcn4 $\Delta$ 101-124 with (GS) <sub>3</sub> linker at junction (Gcn4 nAD)               | pSH940        | <i>LEU2</i>   | (27)             |
| pSH1437     | Fusion of Met4 1-160 to Gcn4 125-281-3xFlag with (GS) <sub>3</sub> linker at junction    | pSH940        | <i>LEU2</i>   | This work        |
| pSH1438     | Fusion of Ino2 1-160 to Gcn4 125-281-3xFlag with (GS) <sub>3</sub> linker at junction    | pSH940        | <i>LEU2</i>   | This work        |
| pSH1436     | Fusion of Pdr1 901-1068 to Gcn4 125-281-3xFlag with (GS) <sub>3</sub> linker at junction | pSH940        | <i>LEU2</i>   | This work        |
| pSH1433     | Fusion of Hap4 321-490 to Gcn4 125-281-3xFlag with (GS) <sub>3</sub> linker at junction  | pSH940        | <i>LEU2</i>   | This work        |
| pSH1440     | Fusion of Gal4 840-841 to Gcn4 125-281-3xFlag with (GS) <sub>3</sub> linker at junction  | pSH940        | <i>LEU2</i>   | This work        |
| pSH1439     | Fusion of Rap1 595-                                                                      | pSH940        | <i>LEU2</i>   | This work        |

|         |                                                                             |        |             |           |
|---------|-----------------------------------------------------------------------------|--------|-------------|-----------|
|         | 720 to Gcn4 125-281-3xFlag with (GS)3 linker at junction                    |        |             |           |
| pSH1434 | Fusion of Rtg3 1-250 to Gcn4 125-281-3xFlag with (GS)3 linker at junction   | pSH940 | <i>LEU2</i> | This work |
| pSH1435 | Fusion of Rtg3 375-486 to Gcn4 125-281-3xFlag with (GS)3 linker at junction | pSH940 | <i>LEU2</i> | This work |
| pSH1135 | <i>pADH1</i> -3xFlag-Gal4 1-100-(GS)3-Gal4 840-881.                         | pRS315 | <i>LEU2</i> | This work |
| pEH260  | SUMO-Med15 158-238                                                          |        |             | (27)      |
| pSH1000 | SUMO- Med15 277-368                                                         |        |             | (27)      |
| pSH1566 | 6xHis- Med15 484-651                                                        |        |             | (20)      |
| pSH1576 | 6xHis- Med15 158-651 $\Delta$ 239-272 $\Delta$ 373-483                      |        |             | (20)      |
| pAL1    | 6xHis- Med15 1-651 $\Delta$ 239-272 $\Delta$ 373-483                        |        |             | (20)      |
| pSH1790 | SUMO-Met4 72-160                                                            |        |             | This work |
| pMB1    | SUMO-Ino2 1-41-(GS)3-96-160                                                 |        |             | This work |
